# Supplementary material for: Assessing the Role of Tandem Repeats in Shaping the Genomic Architecture of Great Apes
Source: PubMed Central journal article supplement (PMC3208591; doi:10.1371/journal.pone.0027239), 2011-11-04

### HSA1

HSA vs PTR  $D=0.231, p=0.006^*$   
HSA vs PPY  $D=0.308, p=0.000^*$

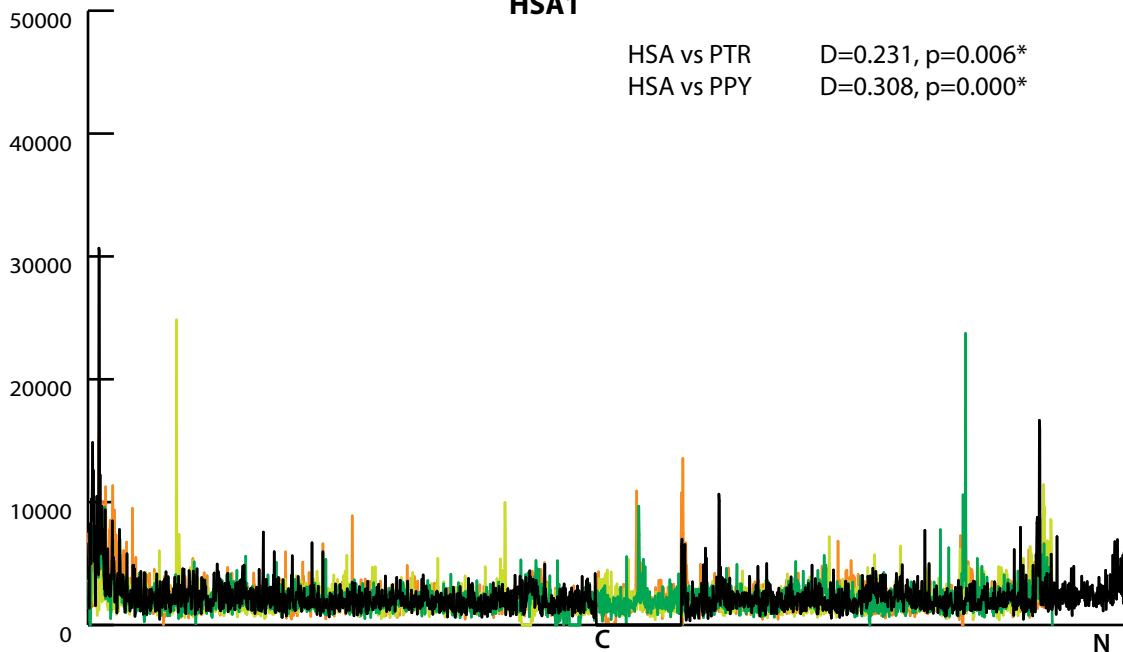

### HSA3

HSA vs PTR  $D=0.188, p=0.062$   
HSA vs PPY  $D=0.234, p=0.009^*$

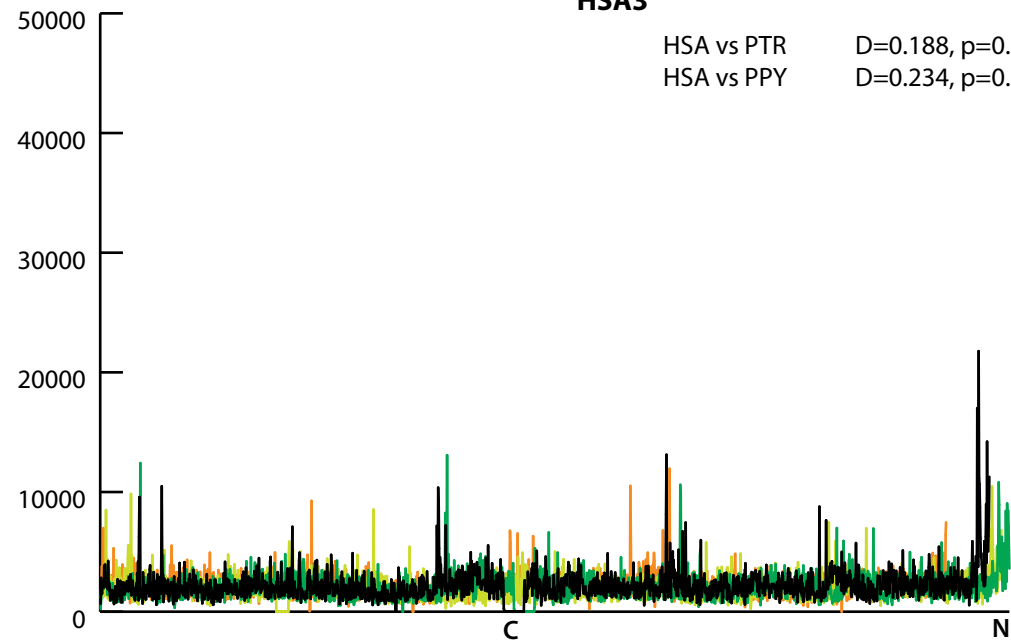

### HSA4

HSA vs PTR  $D=0.217, p=0.022^*$   
HSA vs PPY  $D=0.145, p=0.272$

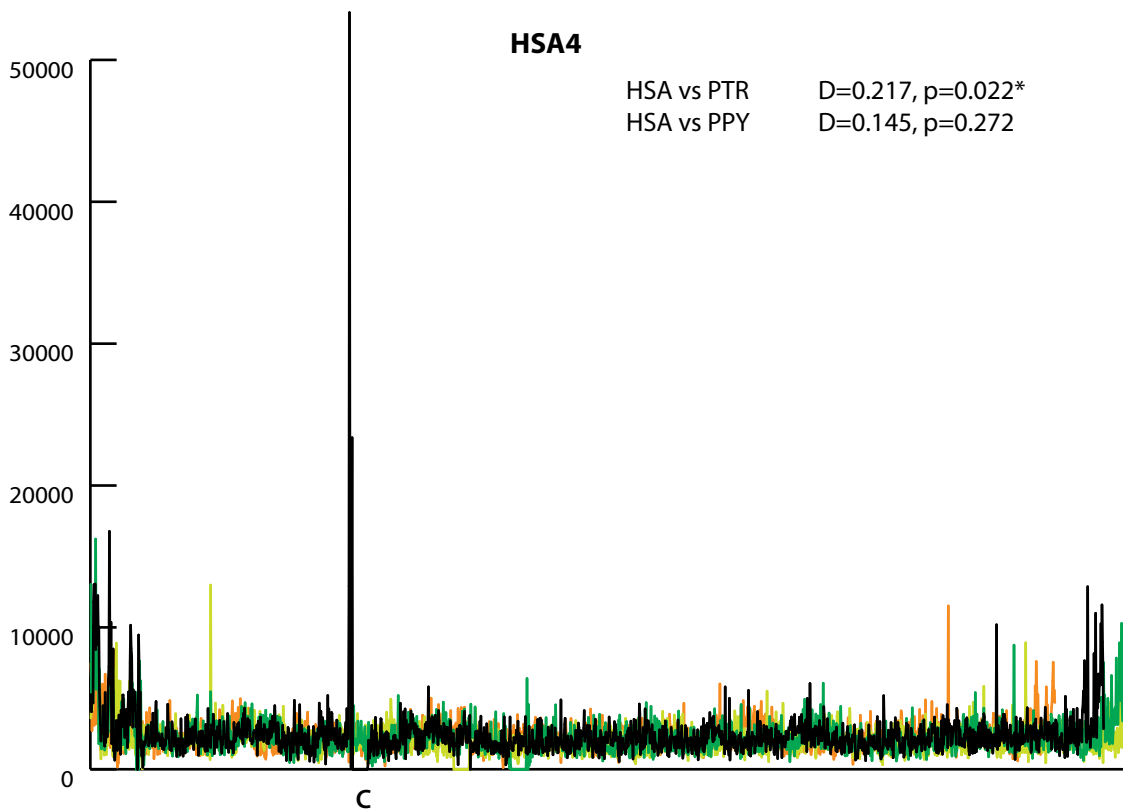

### HSA5

HSA vs PTR  $D=0.218, p=0.031^*$   
HSA vs PPY  $D=0.296, p=0.001^*$

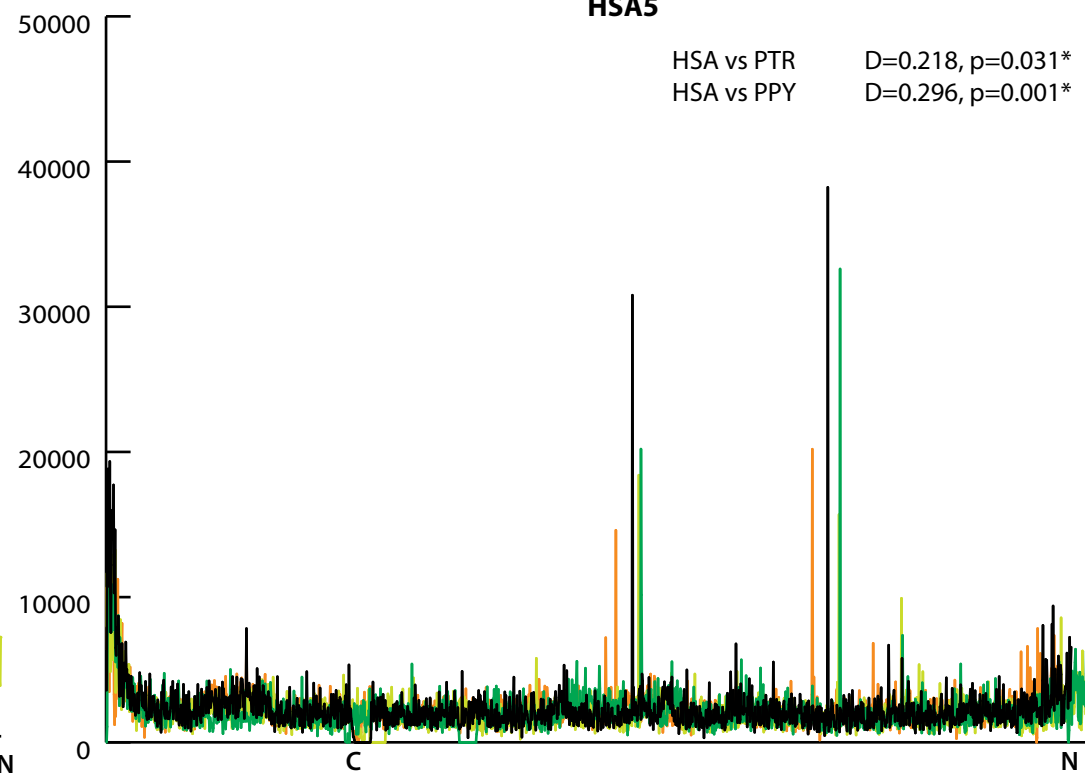

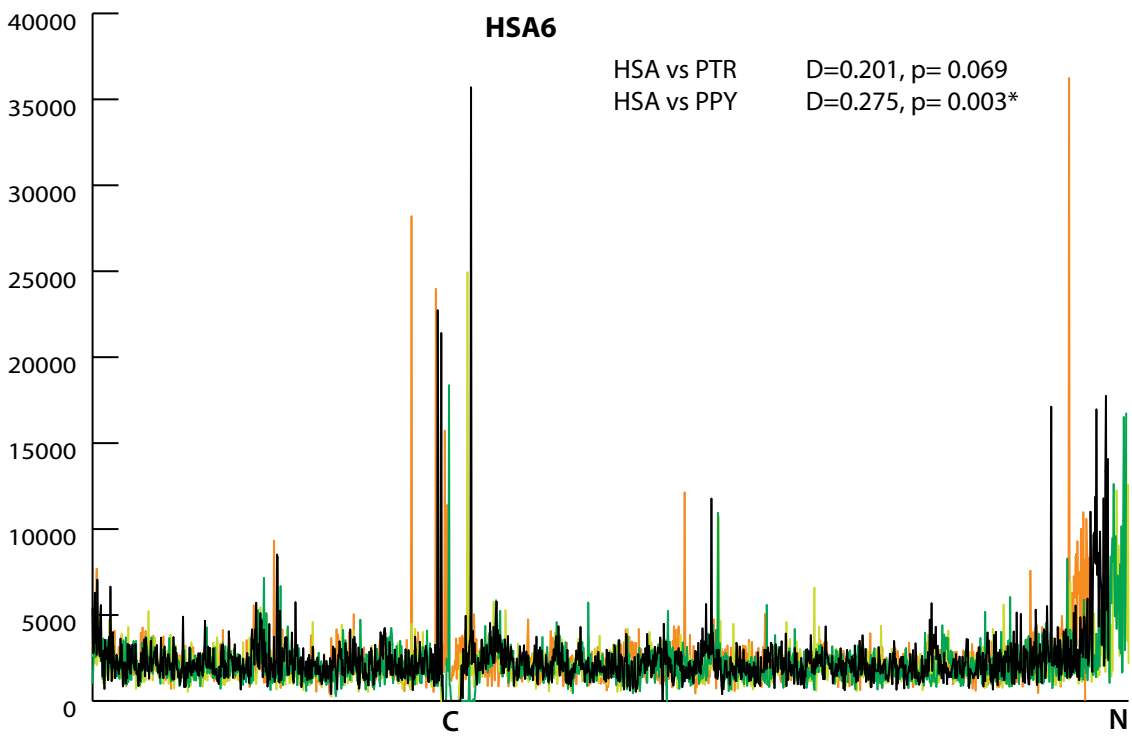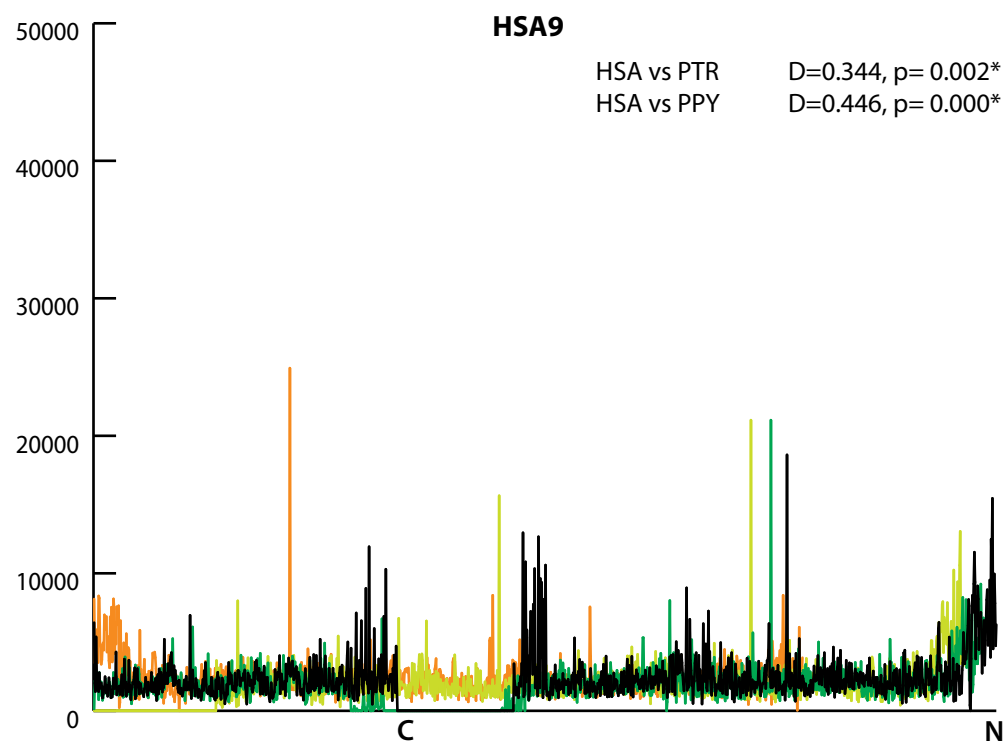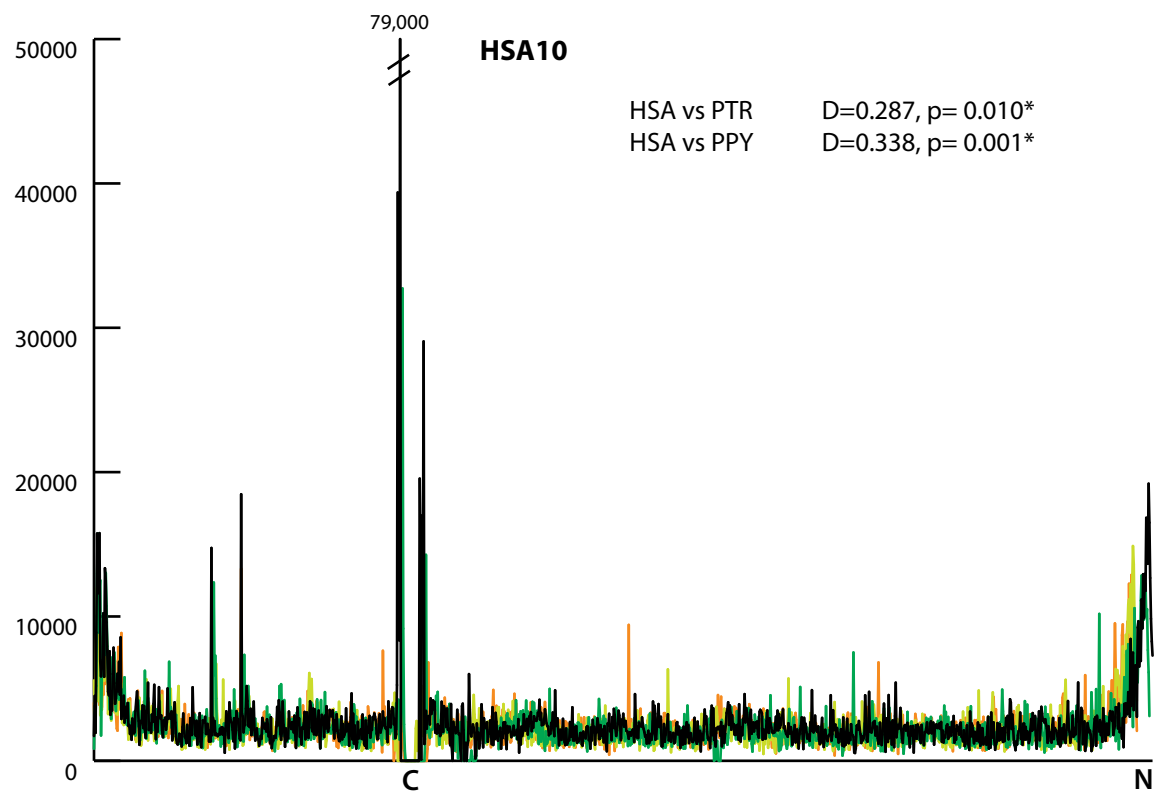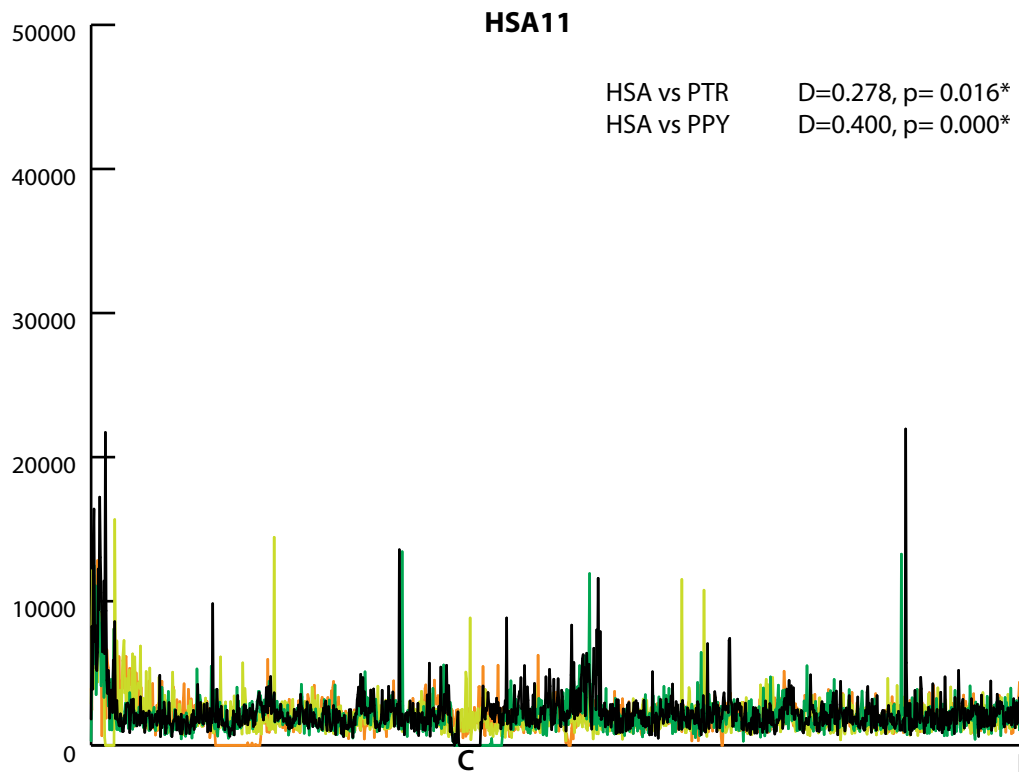

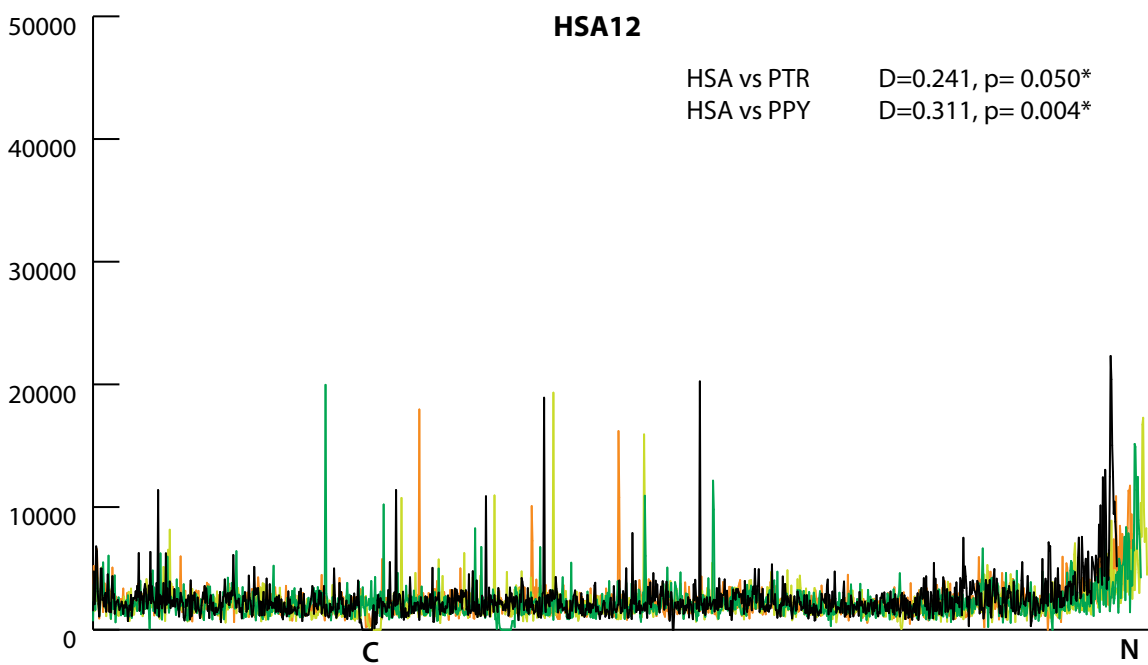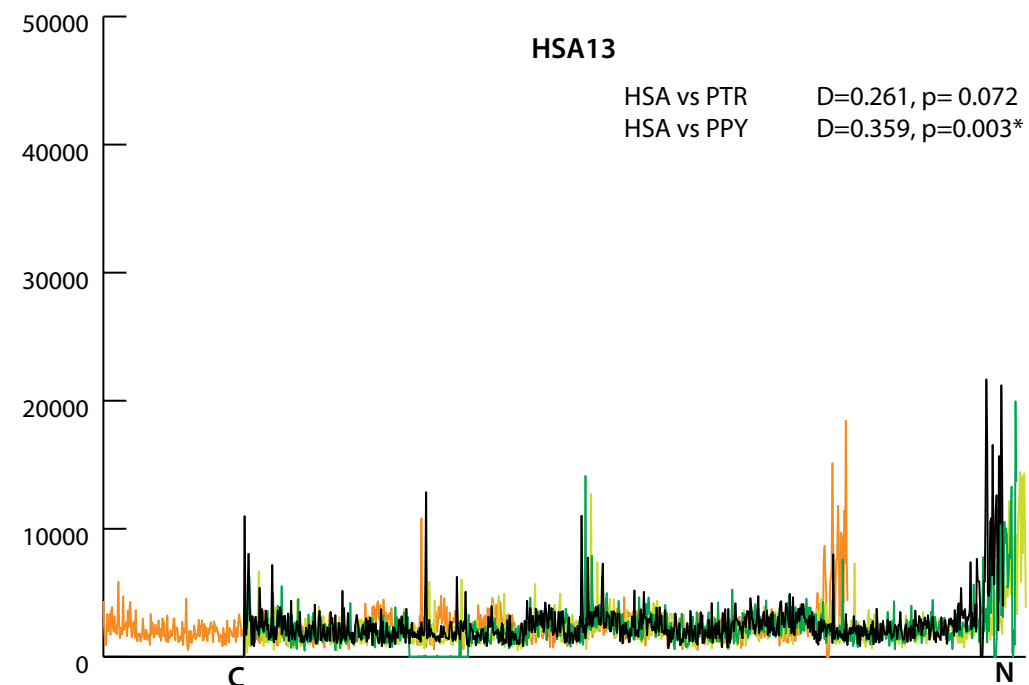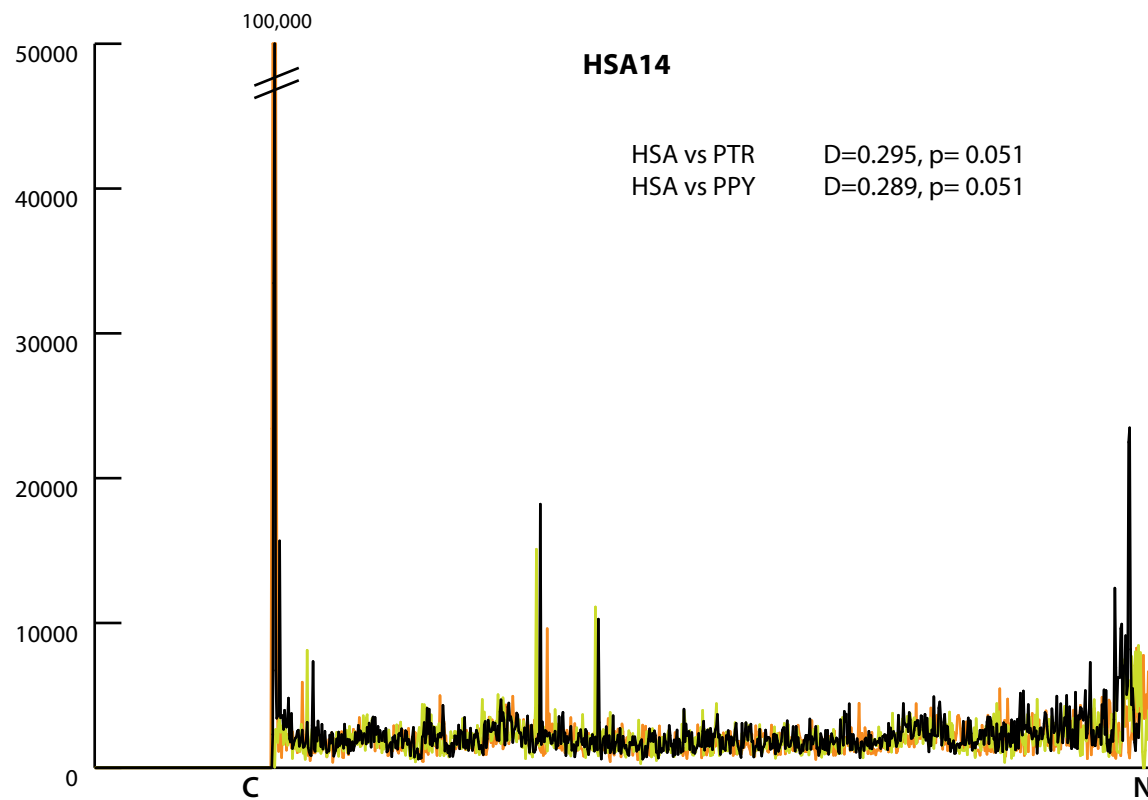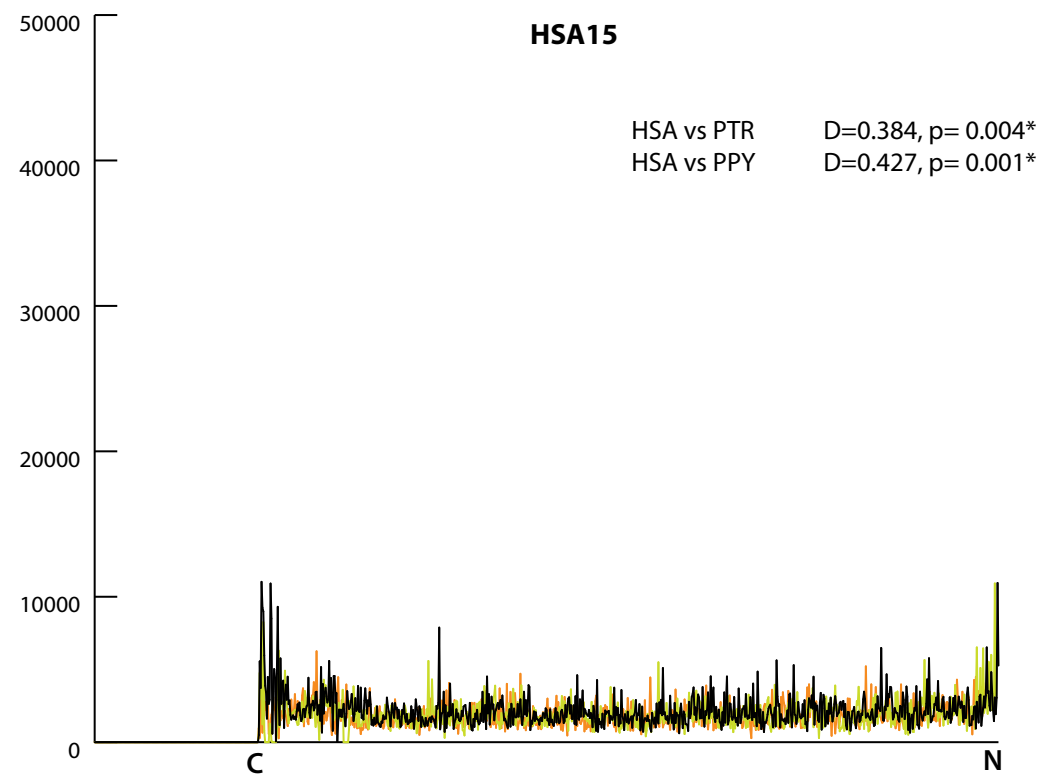

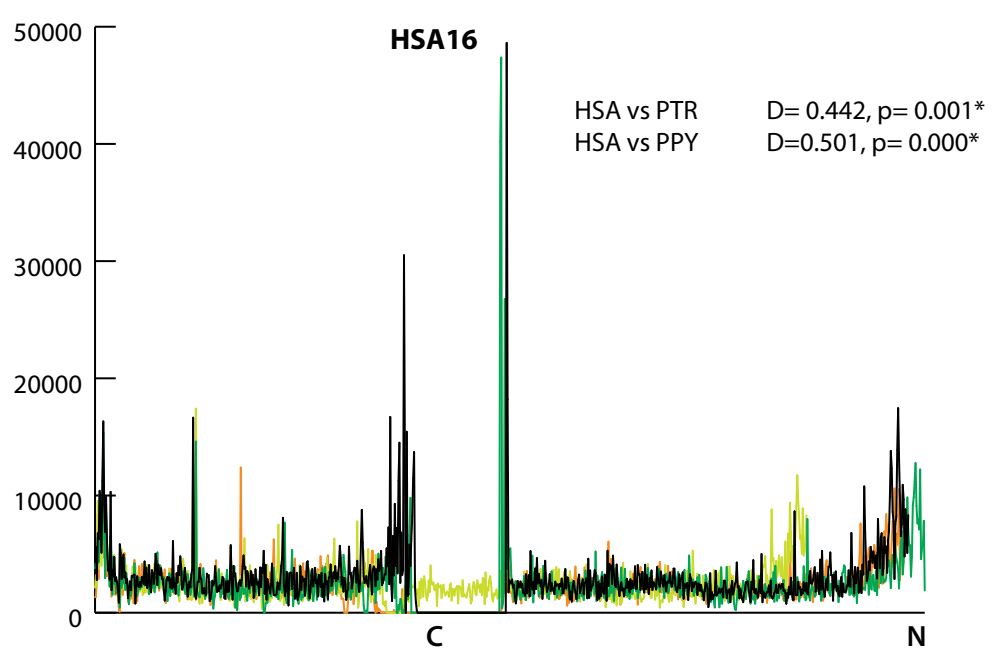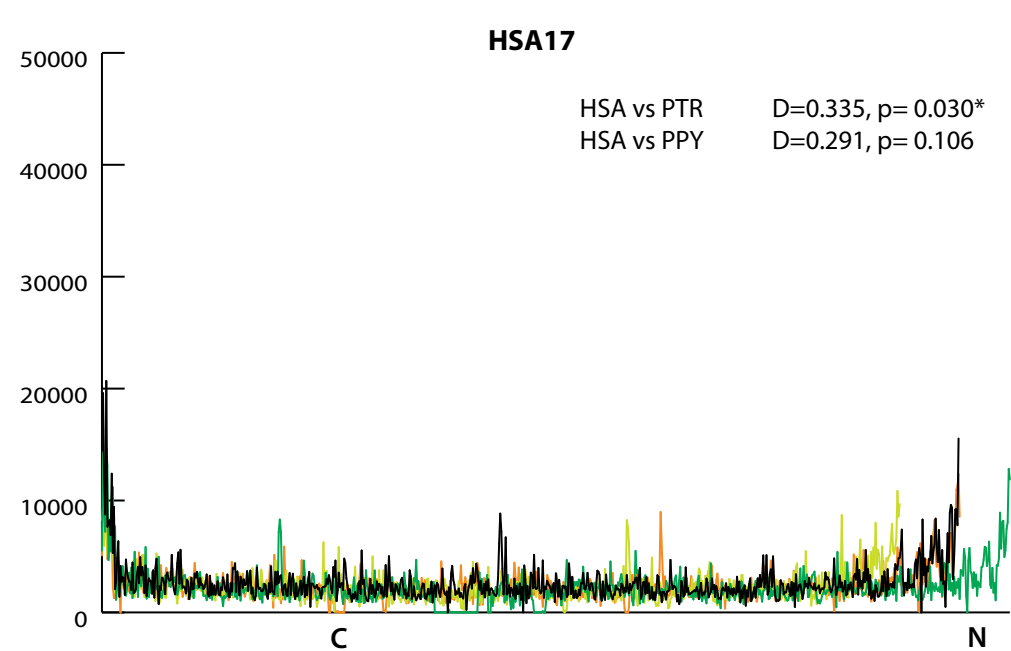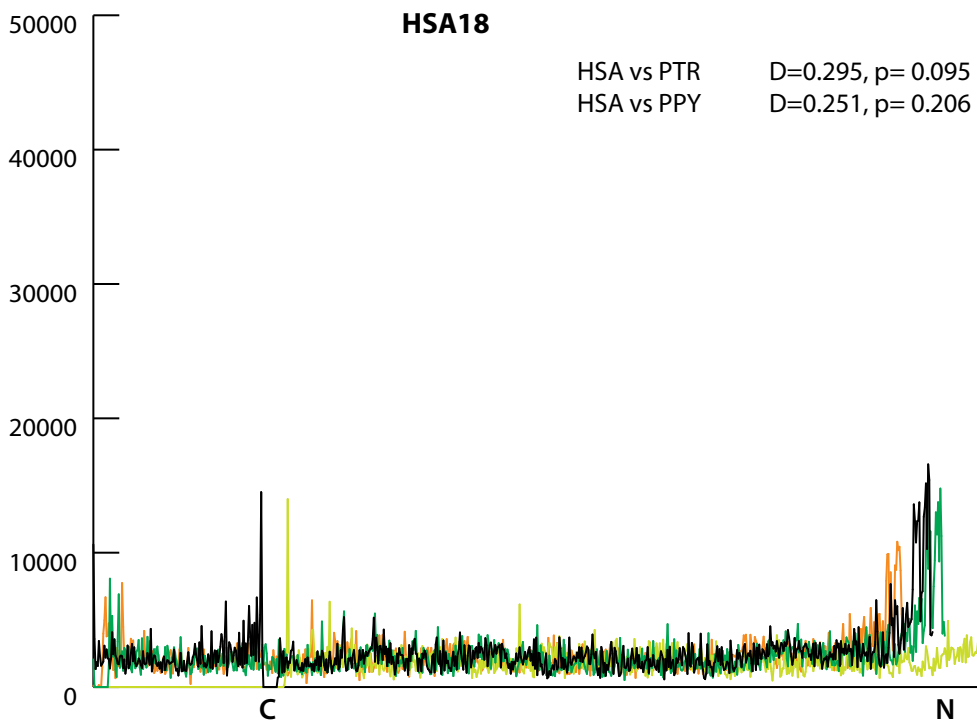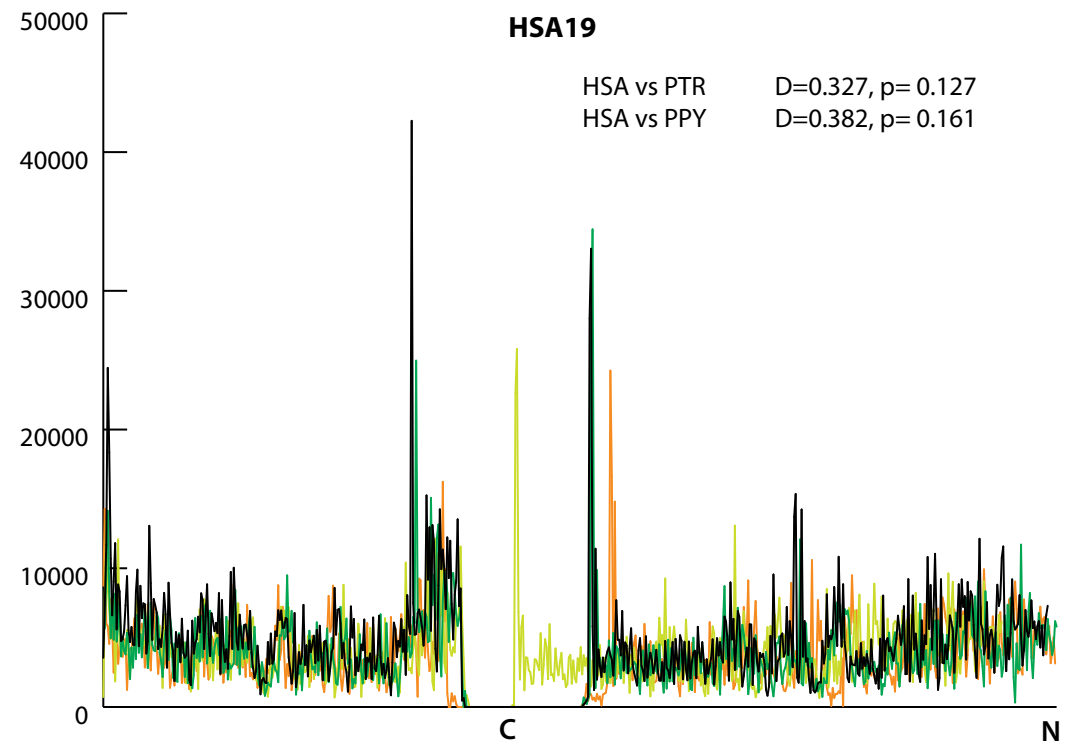

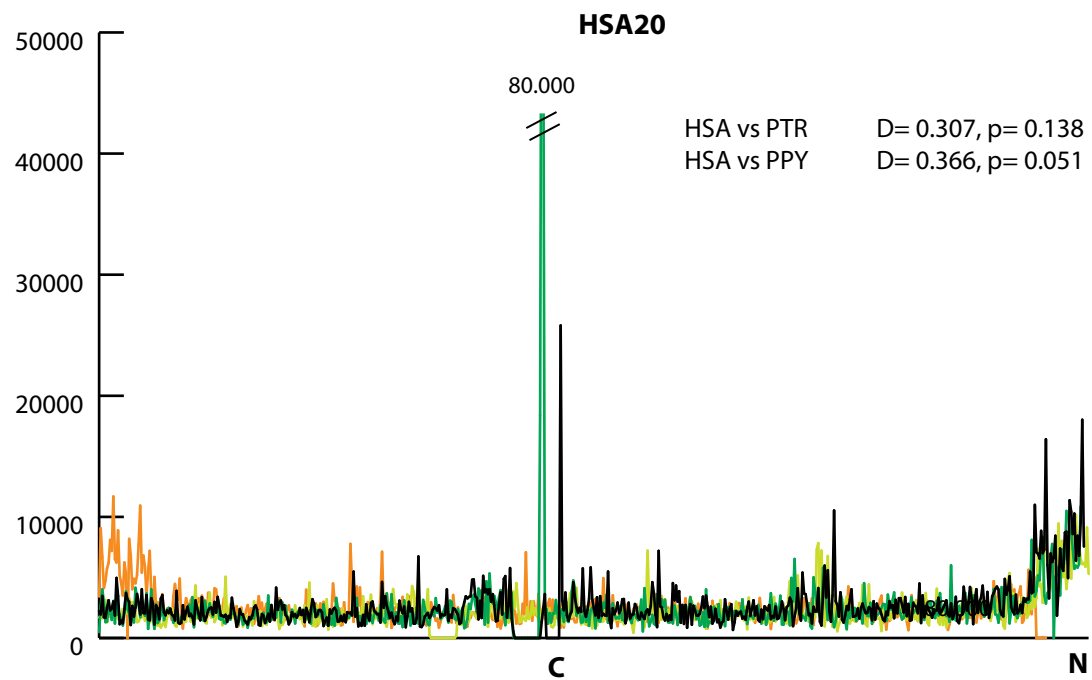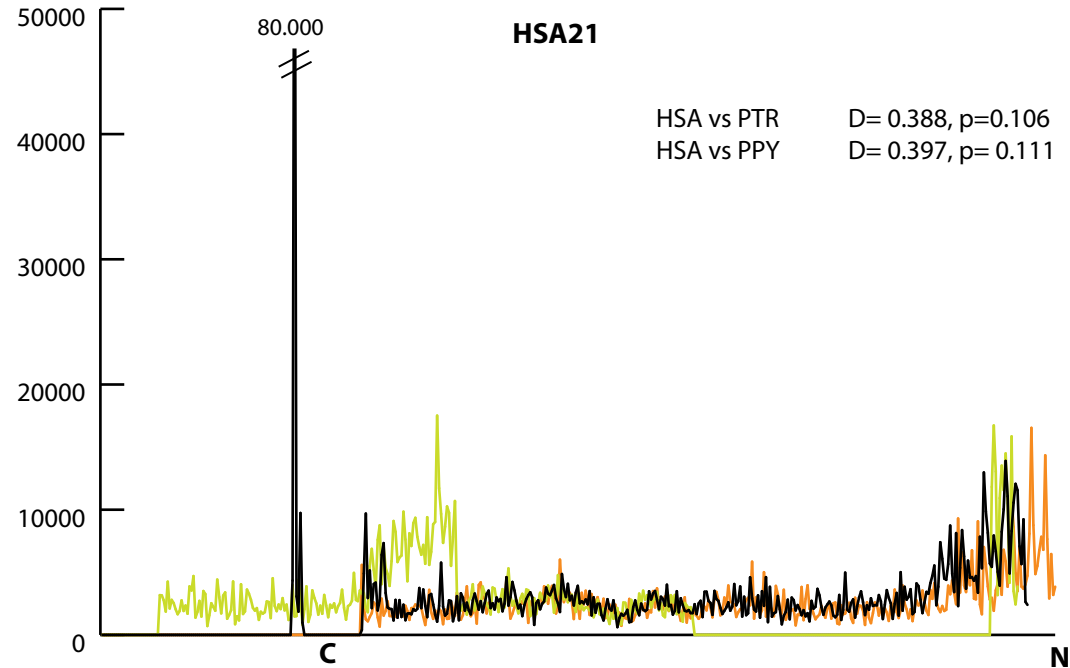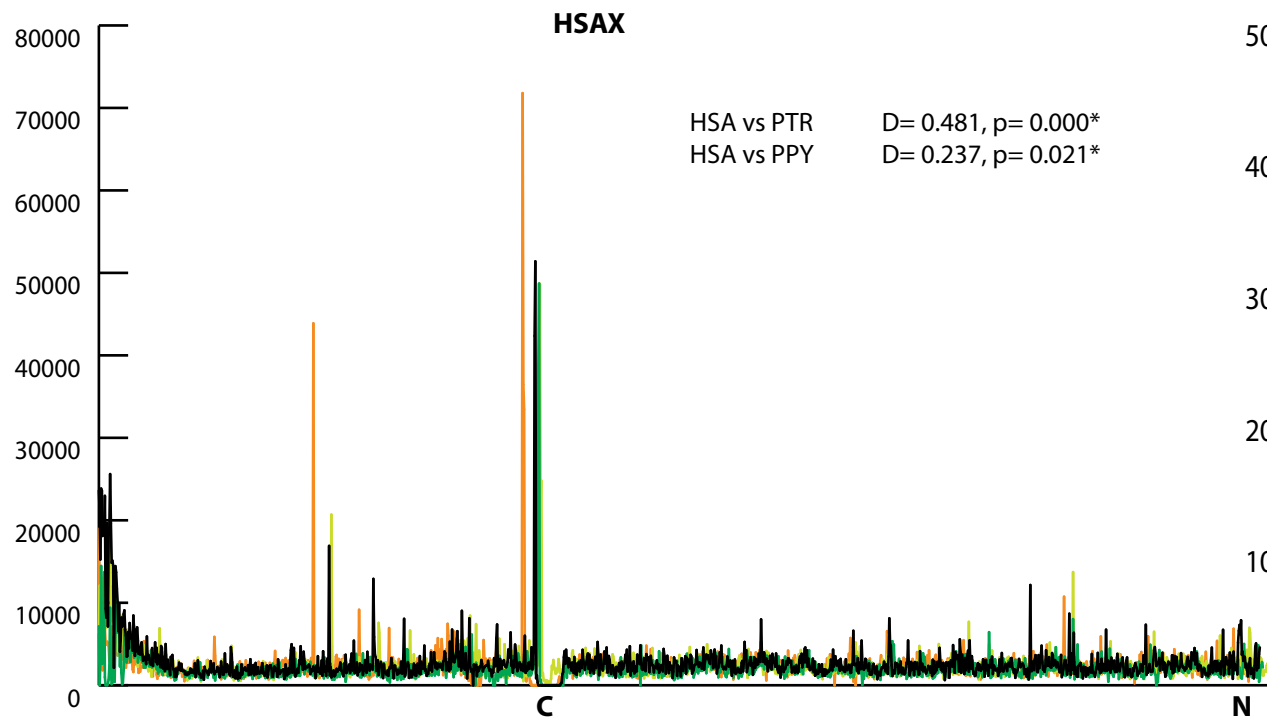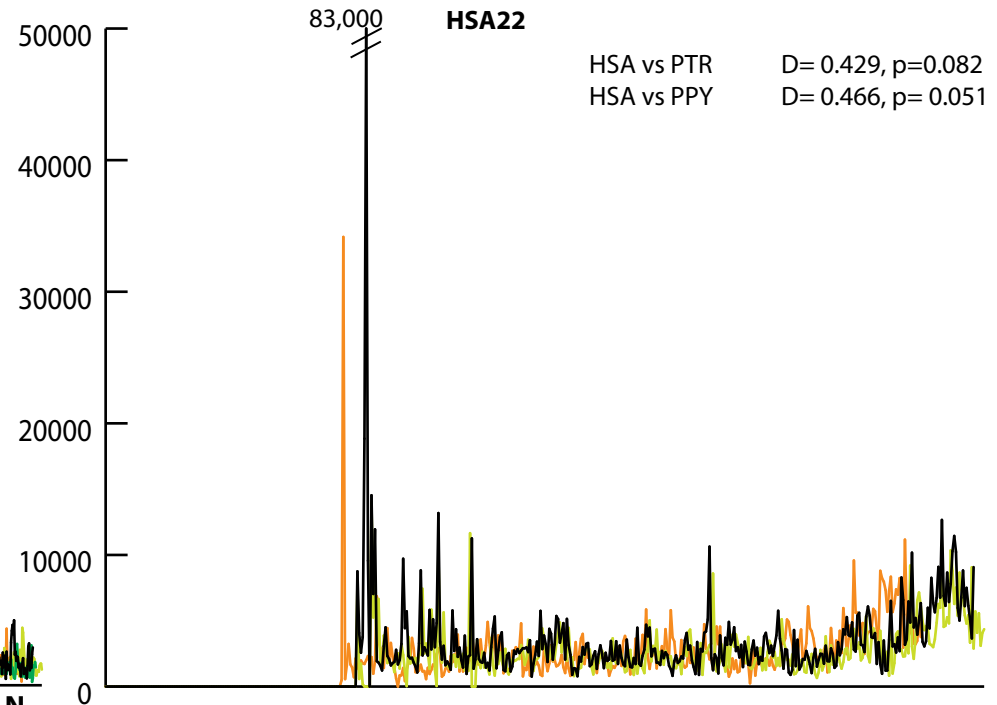

Supplement: pone.0027239.s002.pdf [file pone.0027239.s002.pdf]
